# Supplementary figures and images for: Utilizing 3D Printing Technology to Create Prosthetic Irises: Proof of Concept and Workflow
Source: MDPI journal article supplement (doi:10.3390/bioengineering10111287), 2023-11-06

Supplementary Figure S1

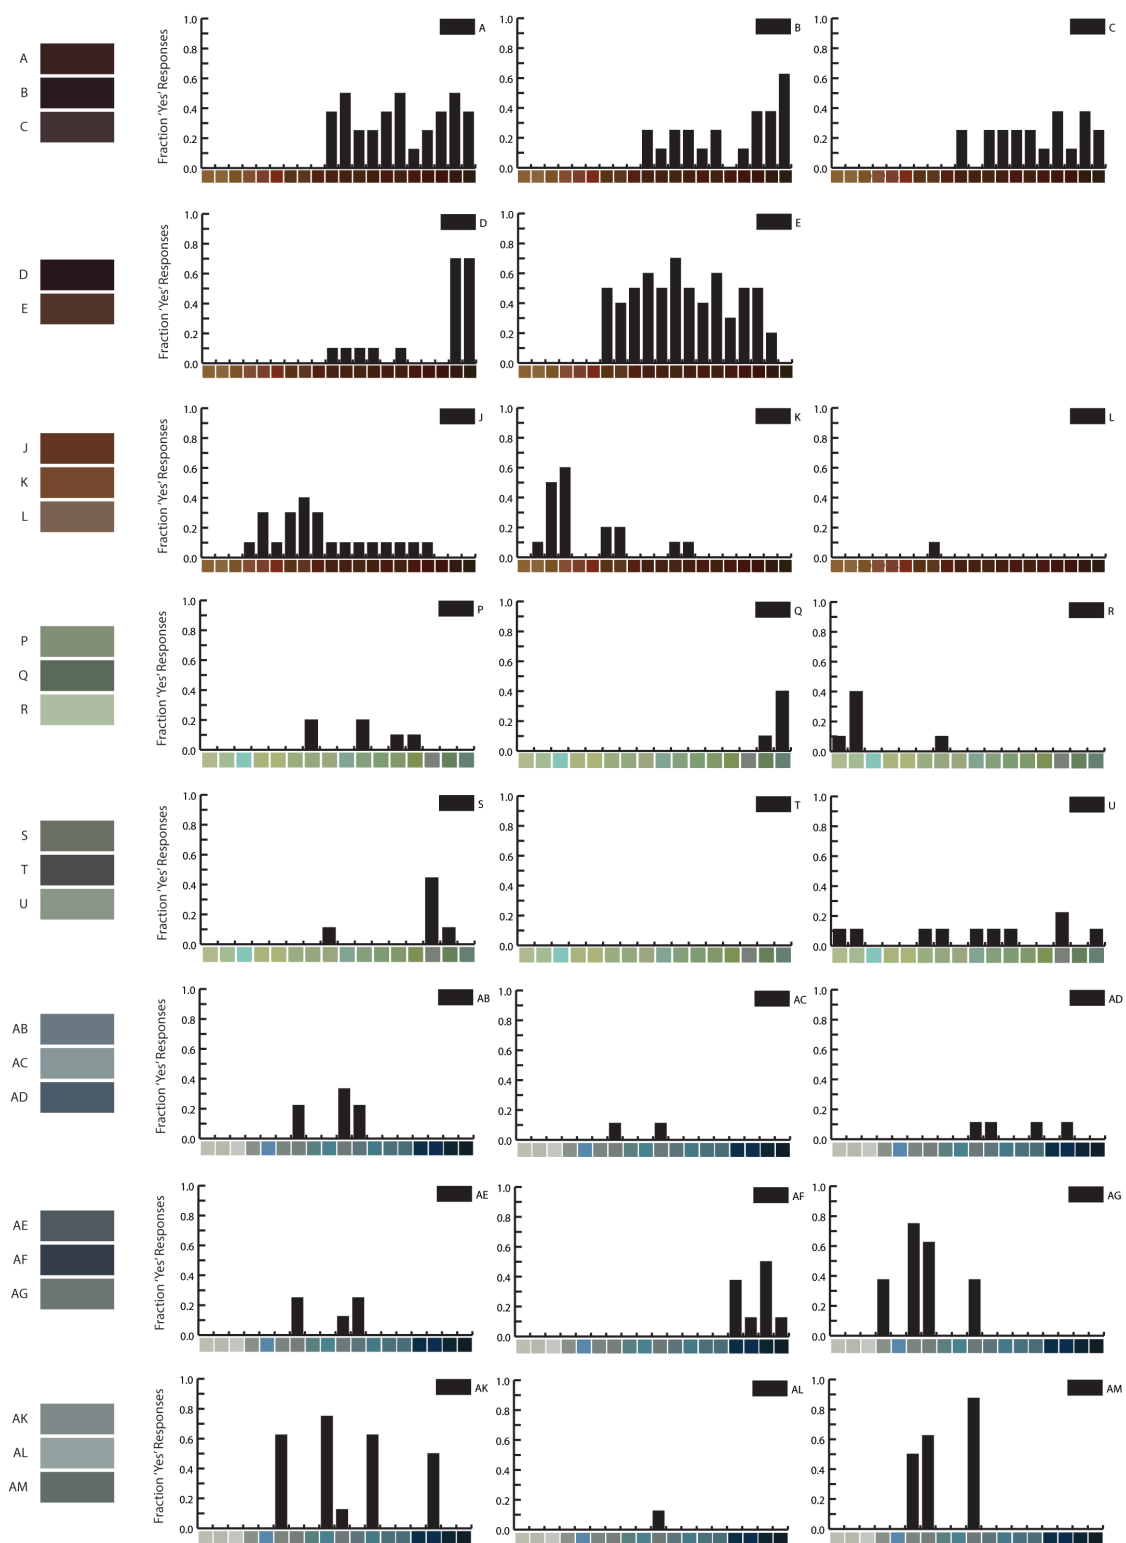

Supplement: s1 [file bioengineering-2604808-supplementary.pdf › bioengineering-2604808-supplementary.pdf]
